# Supplementary material
Source: PubMed Central journal article supplement (PMC5644970)
Supplement: ofa-0010-0353-s01.pdf [file ofa-0010-0353-s01.pdf]

**Original Article**

---

# Methylation Status of *CYP27B1* and *IGF2* Correlate to BMI SDS in Children with Obesity

Orsolya Ács<sup>a</sup> Bálint Péterfia<sup>b</sup> Péter Hollósi<sup>b, c</sup> Andrea Luczay<sup>d</sup>  
Dóra Török<sup>a</sup> András Szabó<sup>a</sup>

<sup>a</sup>2nd Department of Pediatrics, Semmelweis University, Budapest, Hungary; <sup>b</sup>1st Department of Pathology and Experimental Cancer Research, Semmelweis University, Budapest, Hungary; <sup>c</sup>Tumor Progression Research Group, Hungarian Academy of Sciences, Budapest, Hungary; <sup>d</sup>1st Department of Pediatrics, Semmelweis University, Budapest, Hungary

## Supplemental Material

**Supplementary figures**

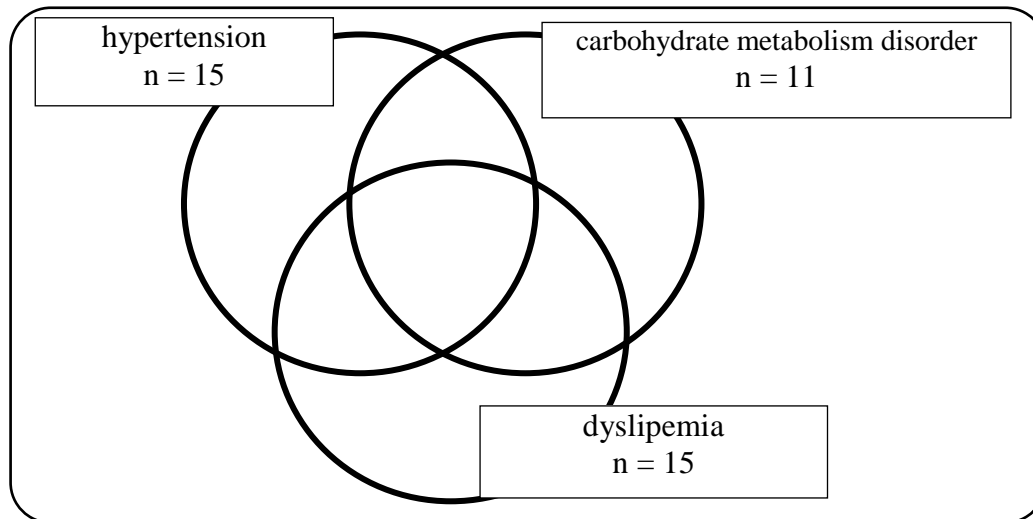

**Supplementary fig. 1.** The prevalence of metabolic consequences in obese children (N = 82) 27 patients of 82 obese children had either hypertension (according to 24-hour monitoring), carbohydrate metabolism disorder (impaired glucose tolerance) and/or dyslipidemia (elevated cholesterol level). One patient had all three of the above mentioned comorbidities and also presented elevated uric acid level. According to our results hypertension and dyslipidemia individually was present in 18.29–18.29 % and carbohydrate metabolism disorder was present in 13.41% of the cases. 9 of 55 the patients without hypertension, impaired glucose tolerance and dyslipidemia presented isolated hyperuricemia (data not shown). 46 patients did not present any signs of comorbidities.

**Supplementary table 1.** Comparing some anthropometric and labor data of obese Hungarian girls and boys

|                                                   | <b>Girls</b><br>(mean ± SD) | <b>Boys</b><br>(mean ± SD) | <b>p value</b> |
|---------------------------------------------------|-----------------------------|----------------------------|----------------|
| <b>Puberty status (pub / all; %)</b>              | 33/42 (78.57 %)             | 27/40 (67.5 %)             |                |
| <b>Age (years)</b>                                | 12.521 ± 3.096              | 12.935 ± 2.688             | 0.5819         |
| <b>BMI SDS</b>                                    | 4.505 ± 0.288               | 3.964 ± 0.244              | 0.1571         |
| <b>Waist circumference (cm)</b>                   | 99.328 ± 17.688             | 104.222 ± 14.439           | 0.2547         |
| <b>Mother's weight gain during pregnancy (kg)</b> | 11.94 ± 1.471               | 13.67 ± 2.513              | 0.5488         |
| <b>Cholesterol (mmol/L)</b>                       | 4.588 ± 0.957               | 4.55 ± 0.897               | 0.2214         |
| <b>HDL (mmol/L)</b>                               | 1.146 ± 0.263               | 1.165 ± 0.333              | 0.7863         |
| <b>Triglyceride (mmol/L)</b>                      | 1.404 ± 0.561               | 1.459 ± 0.646              | 0.6837         |
| <b>ALP (IU/L)</b>                                 | 184.2 ± 15.589              | 230.3 ± 16.41              | <b>0.0452</b>  |
| <b>SGOT (IU/L)</b>                                | 20.29 ± 6.115               | 22.17 ± 7.114              | 0.3130         |
| <b>SGPT (IU/L)</b>                                | 18.23 ± 1.335               | 28.10 ± 3.813              | <b>0.0228</b>  |
| <b>Fasting glucose (mmol/L)</b>                   | 4.974 ± 0.429               | 5.11 ± 0.486               | 0.1818         |
| <b>Vitamin D (ng/mL)</b>                          | 18.252 ± 6.414              | 19.26 ± 7.505              | 0.5146         |

*SD: standard deviation, BMI SDS: body mass index standard deviation score, HDL: High-density lipoprotein, ALP: Alkaline phosphatase, SGOT: Serum glutamic oxaloacetic transaminase, SGPT: Serum glutamate-pyruvate transaminase*

**Supplementary table 2.** Correlation of vitamin D level with anthropometric, metabolic parameters and methylation status

| <b>Vitamin D (ng/mL)</b> | <b>correlation with</b>                    | <b>r value</b> | <b>p value</b> |
|--------------------------|--------------------------------------------|----------------|----------------|
|                          | BMI SDS                                    | -0.1191        | 0.2866         |
|                          | Waist circumference (cm)                   | -0.1193        | 0.3682         |
|                          | Mother's weight gain during pregnancy (kg) | 0.06752        | 0.6021         |
|                          | Cholesterol(mmol/L)                        | -0.01635       | 0.8848         |
|                          | HDL(mmol/L)                                | -0.1465        | 0.1946         |
|                          | Triglyceride (mmol/L)                      | -0.0764        | 0.5061         |
|                          | ALP (U/L)                                  | 0.03449        | 0.7705         |
|                          | SGOT (U/L)                                 | 0.1546         | 0.2786         |
|                          | SGPT (U/L)                                 | 0.04095        | 0.787          |
|                          | Fasting glucose (mmol/L)                   | 0.002146       | 0.9847         |
|                          | Fasting insulin (mIU/L)                    | -0.02664       | 0.8145         |
|                          | HOMA index                                 | -0.04825       | 0.6669         |
|                          | Uric acid (umol/L)                         | 0.05179        | 0.6482         |
|                          | <i>VDR_2</i> methylation %                 | 0.2053         | 0.066          |
|                          | <i>VDR_3</i> methylation %                 | 0.1649         | 0.1388         |
|                          | <i>CYP27B1_1</i> methylation %             | 0.1245         | 0.2652         |
|                          | <i>CYP27B1_2</i> methylation %             | 0.1033         | 0.3618         |
|                          | <i>IGF2</i> methylation %                  | -0.05146       | 0.6503         |
|                          | <i>POMC</i> methylation %                  | 0.1664         | 0.1352         |

*BMI SDS: body mass index standard deviation score, HDL: High-density lipoprotein, ALP: Alkaline phosphatase, SGOT: Serum glutamic oxaloacetic transaminase, SGPT: Serum glutamate-pyruvate transaminase, VDR: vitamin D receptor gene, CYP27B1: 1-alfa-hydroxylase gene, IGF2: insulin like growth factor gene, POMC: proopiomelanocortin gene*

**Supplementary table 3.** Correlation of BMI SDS with anthropometric, metabolic parameters and methylation status

| <b>BMI SDS</b> | <b>correlation with</b>                    | <b>r value</b> | <b>p value</b>  |
|----------------|--------------------------------------------|----------------|-----------------|
|                | Waist circumference (cm)                   | 0.5655         | < <b>0.0001</b> |
|                | Mother's weight gain during pregnancy (kg) | 0.06616        | 0.6094          |
|                | Cholesterol (mmol/L)                       | 0.1545         | 0.1684          |
|                | HDL(mmol/L)                                | -0.07089       | 0.532           |
|                | Triglyceride (mmol/L)                      | 0.02641        | 0.8185          |
|                | ALP (IU/L)                                 | -0.1698        | 0.1481          |
|                | SGOT (IU/L)                                | -0.0574        | 0.6891          |
|                | SGPT (IU/L)                                | 0.01273        | 0.9331          |
|                | Fasting glucose (mmol/L)                   | -0.1765        | 0.1127          |
|                | Fasting insulin (mIU/L)                    | 0.3539         | <b>0.0013</b>   |
|                | HOMA index                                 | 0.2757         | <b>0.0122</b>   |
|                | Uric acid (umol/L)                         | 0.2333         | <b>0.0373</b>   |
|                | <i>VDR_2</i> methylation %                 | -0.06579       | 0.5595          |
|                | <i>VDR_3</i> methylation %                 | -0.1531        | 0.1697          |
|                | <i>CYP27B1_1</i> methylation %             | 0.1816         | 0.1025          |
|                | <i>CYP27B1_2</i> methylation %             | 0.2371         | <b>0.0342</b>   |
|                | <i>IGF2</i> methylation %                  | -0.305         | <b>0.0059</b>   |
|                | <i>POMC</i> methylation %                  | 0.1334         | 0.2321          |

*BMI SDS: body mass index standard deviation score, HDL: High-density lipoprotein, ALP: Alkaline phosphatase, SGOT: Serum glutamic oxaloacetic transaminase, SGPT: Serum glutamate-pyruvate transaminase, VDR: vitamin D receptor gene, CYP27B1: 1-alfa-hydroxylase gene, IGF2: insulin like growth factor gene, POMC: proopiomelanocortin gene*

**Supplementary table 4.** Linear regression models including IGF2 and CYP27B1 methylation status, vitamin D as predictive variables and BMI SDS as dependent variable

| Model | Unstandardized Coefficients |            | Standardized Coefficients<br>Beta | t      | Sig.         |
|-------|-----------------------------|------------|-----------------------------------|--------|--------------|
|       | B                           | Std. Error |                                   |        |              |
| 1*    | (Constant)                  | 5.094      | 1.863                             | 2.735  | 0.008        |
|       | IGF2 met%                   | -0.083     | 0.034                             | -0.264 | <b>0.018</b> |
|       | CYP27B1 met %               | 0.197      | 0.104                             | 0.207  | <b>0.061</b> |
|       | vitamin D<br>(ng/mL)        | 0.028      | 0.031                             | 0.100  | <b>0.365</b> |
| 2     | (Constant)                  | 5,339      | 1.841                             | 2.899  | 0.005        |
|       | IGF2 met%                   | -0.079     | 0.034                             | -0.251 | <b>0.023</b> |
|       | CYP27B1 met%                | 0.209      | 0.103                             | 0.219  | <b>0.046</b> |

\*Model 1 included CYP27B1, IGF2 methylation status and Vitamin D level as variables. CYP27B1 (p= 0.061) and IGF2 (p= 0.018) methylation status were significantly associated with BMI SDS while vitamin D level did not show significant association (p= 0.365).

*BMI SDS: body mass index standard deviaton score, CYP27B1: 1-alfa-hydroxylase gene, IGF2: insulin like growth factor gene*

**Supplementary table 5.** Model fit for Model 1 and Model 2 (final model) (final model)

| Model |            | Sum of Squares | df | Mean Square | F      | Sig.p                    |
|-------|------------|----------------|----|-------------|--------|--------------------------|
| 1     | Regression | 31.175         | 3  | 10.392      | 3.767  | 0.014 <sup>b</sup>       |
|       | Residual   | 206.917        | 75 | 2.759       |        |                          |
|       | Total      | 238.092        | 78 |             |        |                          |
| 2     | Regression | 28.882         | 2  | 14.441      | 5.246* | <b>0.007<sup>c</sup></b> |
|       | Residual   | 209.210        | 76 | 2.753       |        |                          |
|       | Total      | 238.092        | 78 |             |        |                          |

\*Model 2 as statistically significant final model predicting BMI SDS accounted for 9.8 % of the variance (  $F(2,78) = 5.246$   $p=0.007$ ).

<sup>a</sup> Dependent Variable: BMI SDS <sup>b</sup> Predictors: (Constant), D vitamin (ng/mL), *CYP27B1* met % , *IGF2* met % <sup>c</sup> Predictors: (Constant), *CYP27B1* met% , *IGF2* met %

*BMI SDS*: body mass index standard deviation score, *CYP27B1*: 1- $\alpha$ -hydroxylase gene, *IGF2*: insulin like growth factor gene
